# Supplementary material
Source: publisher site journal article supplement (https://www.dovepress.com/article/154719)
Supplement: Supplementary file 1 [file get_supplementary_file.php]

## **Supporting Information File S1: Ethics Statement**

The PREPARE-2 study was evaluated and approved by the medical ethics committee of the Leiden University Medical Center (LUMC). The medical ethics committee or institutional review board (as appropriate) of the other participating centers only evaluated the local feasibility of the study and thereafter gave their approval. These centers are:

- Amsterdam, Academic Medical Center
- Amsterdam, Sint Lucas-Andreas Hospital
- Amsterdam, VU Medical Center
- Apeldoorn, Gelre Hospitals
- Breda, Amphia Hospital
- Delft, Reinier de Graaf
- Den Bosch, Jeroen Bosch Hospital
- The Hague: Medical Center Haaglanden
- Ede, Hospital Gelderse Vallei
- Eindhoven, Catharina Hospital
- Emmen, Scheper Hospital (approval also included Beilen, Dialysis Clinic North)
- Goes, Admiraal de Ruyter Hospital
- Gouda, Groene Hart Hospital
- Groningen, University Medical Center Groningen
- Haarlem, Kennemer Gasthuis
- Leeuwarden, Medical Center Leeuwarden
- Leiden, Leiden University Medical Center
- Leiderdorp, Rijnland Hospital
- Roermond, Laurentius Hospital
- Roosendaal, Franciscus Hospital
- Rotterdam, Franciscus Gasthuis
- Veldhoven, Máxima Medical Center
- Zaandam, Zaans Medical Center
- Zwolle, Isala Clinics

**Table S1.** Vitamin K antagonist use and renal function decline; PREPARE cohort stratification

|                                                      | PREPARE-I                                                                   | PREPARE-II                                                                  |
|------------------------------------------------------|-----------------------------------------------------------------------------|-----------------------------------------------------------------------------|
| Mean decline in eGFR (ml/min/1.73 m <sup>2</sup> /y) | -2.97 (-3.51 to -2.43)                                                      | -2.05 (-2.46 to -1.64)                                                      |
|                                                      | Change in decline in eGFR<br>ml/min/1.73m <sup>2</sup> per year (95%<br>CI) | Change in decline in<br>eGFR ml/min/1.73m <sup>2</sup><br>per year (95% CI) |
| Vitamin K antagonist non-users                       | Reference                                                                   | Reference                                                                   |
| Vitamin K antagonist users, crude                    | 1.83 (0.06 to 3.59)                                                         | 0.22 (-1.05 to 1.48)                                                        |
| Vitamin K antagonist users, adjusted <sup>a</sup>    | 1.17 (-0.71 to 3.06)                                                        | -0.32 (-1.78 to 1.14)                                                       |
| Vitamin K antagonist users, adjusted <sup>b</sup>    | 1.11 (-0.86 to 3.07)                                                        | -0.40 (-1.89 to 1.09)                                                       |

<sup>a</sup>Adjusted for: age, sex, race, diabetes mellitus, hypertension, cardiovascular disease, malignancy, gastro-intestinal problems, antiplatelet drug use, and primary kidney disease

<sup>b</sup>Additionally adjusted for hemoglobin levels

**Table S2.** Vitamin K antagonist use and hazard ratios for start of dialysis; PREPARE cohort stratification

|                                                   | PREPARE-I           | PREPARE-II          |
|---------------------------------------------------|---------------------|---------------------|
|                                                   | HR (95% CI)         | HR (95% CI)         |
| Vitamin K antagonist non-users                    | 1 (reference)       | 1 (reference)       |
| Vitamin K antagonist users, crude                 | 0.99 (0.66 to 1.50) | 0.87 (0.56 to 1.34) |
| Vitamin K antagonist users, adjusted <sup>a</sup> | 1.11 (0.73 to 1.70) | 0.85 (0.52 to 1.38) |
| Vitamin K antagonist users, adjusted <sup>b</sup> | 1.38 (0.87 to 2.18) | 1.09 (0.63 to 1.86) |

<sup>a</sup>Adjusted for: age, sex, race, diabetes mellitus, hypertension, cardiovascular disease, malignancy, gastro-intestinal problems, antiplatelet drug use, and primary kidney disease

<sup>b</sup>Additionally adjusted for hemoglobin and eGFR levels

**Table S3.** Vitamin K antagonist use and renal function decline; extra adjustments

|                                                   | Change in decline in eGFR<br>ml/min/1.73m <sup>2</sup> per year (95%<br>CI) |
|---------------------------------------------------|-----------------------------------------------------------------------------|
| Vitamin K antagonist non-users                    | Reference                                                                   |
| Vitamin K antagonist users, adjusted <sup>a</sup> | -0.12 (-1.30 to 1.05)                                                       |
| Vitamin K antagonist users, adjusted <sup>b</sup> | -0.17 (-1.42 to 1.08)                                                       |
| Vitamin K antagonist users, adjusted <sup>c</sup> | 0.23 (-1.74 to 2.20)                                                        |

<sup>a</sup>Adjusted for: age, sex, race, diabetes mellitus, hypertension, malignancy, gastro-intestinal problems, antiplatelet drug use, primary kidney disease, and haemoglobin (no cardiovascular disease)

<sup>b</sup>Adjusted for: age, sex, race, diabetes mellitus, hypertension, cardiovascular disease, malignancy, gastro-intestinal problems, antiplatelet drug use, primary kidney disease, haemoglobin, ACE inhibition, ARB use, blood pressure

<sup>c</sup>Adjusted for: age, sex, race, diabetes mellitus, hypertension, cardiovascular disease, malignancy, gastro-intestinal problems, antiplatelet drug use, primary kidney disease, haemoglobin, CRP, BMI, albumin, and proteinuria

**Table S4.** Vitamin K antagonist use and hazard ratios for start of dialysis; extra adjustments

|                                                   | <b>HR (95% CI)</b>  |
|---------------------------------------------------|---------------------|
| Vitamin K antagonist non-users                    | 1<br>(reference)    |
| Vitamin K antagonist users, adjusted <sup>a</sup> | 1.23 (0.88 to 1.73) |
| Vitamin K antagonist users, adjusted <sup>b</sup> | 0.80 (0.37-1.74)    |

<sup>a</sup>Adjusted for: age, sex, race, diabetes mellitus, hypertension, malignancy, gastro-intestinal problems, antiplatelet drug use, primary kidney disease, haemoglobin, and eGFR levels (no cardiovascular disease)

<sup>b</sup>Additionally adjusted for cardiovascular disease, CRP, BMI, albumin, and proteinuria

**Table S5.** Vitamin K antagonist use and renal function decline; restriction to persistent non-users and users of vitamin K antagonists

| Mean decline in eGFR (ml/min/1.73 m <sup>2</sup> /y) | -1.52 (-1.87 to -1.16)                                                      |
|------------------------------------------------------|-----------------------------------------------------------------------------|
|                                                      | Change in decline in eGFR<br>ml/min/1.73m <sup>2</sup> per year (95%<br>CI) |
| Vitamin K antagonist non-users                       | Reference                                                                   |
| Vitamin K antagonist users, crude                    | 0.63 (-0.69 to 1.94)                                                        |
| Vitamin K antagonist users, adjusted <sup>a</sup>    | 0.18 (-1.13 to 1.49)                                                        |
| Vitamin K antagonist users, adjusted <sup>b</sup>    | 0.15 (-1.17 to 1.47)                                                        |

<sup>a</sup>Adjusted for: age, sex, race, diabetes mellitus, hypertension, cardiovascular disease, malignancy, gastro-intestinal problems, antiplatelet drug use, and primary kidney disease

<sup>b</sup>Additionally adjusted for hemoglobin levels

**Table S6.** Vitamin K antagonist use and hazard ratios for start of dialysis; restriction to persistent non-users and users of vitamin K antagonists

|                                                   | <b>HR (95% CI)</b>  |
|---------------------------------------------------|---------------------|
| Vitamin K antagonist non-users                    | 1<br>(reference)    |
| Vitamin K antagonist users, crude                 | 0.98 (0.73 to 1.34) |
| Vitamin K antagonist users, adjusted <sup>a</sup> | 1.05 (0.75 to 1.47) |
| Vitamin K antagonist users, adjusted <sup>b</sup> | 1.36 (0.96 to 1.93) |

<sup>a</sup>Adjusted for: age, sex, race, diabetes mellitus, hypertension, cardiovascular disease, malignancy, gastro-intestinal problems, antiplatelet drug use, and primary kidney disease

<sup>b</sup>Additionally adjusted for hemoglobin and eGFR levels

**Table S7.** Vitamin K antagonist use and renal function decline; restriction to patients with cardiovascular disease

| Mean decline in eGFR (ml/min/1.73 m <sup>2</sup> /y) | -2.14 (-2.64 to -1.64)                                                      |
|------------------------------------------------------|-----------------------------------------------------------------------------|
|                                                      | Change in decline in eGFR<br>ml/min/1.73m <sup>2</sup> per year (95%<br>CI) |
| Vitamin K antagonist non-users                       | Reference                                                                   |
| Vitamin K antagonist users, crude                    | 0.25 (-1.24 to 1.74)                                                        |
| Vitamin K antagonist users, adjusted <sup>a</sup>    | 0.19 (-1.38 to 1.75)                                                        |
| Vitamin K antagonist users, adjusted <sup>b</sup>    | 0.07 (-1.50 to 1.64)                                                        |

<sup>a</sup>Adjusted for: age, sex, race, diabetes mellitus, hypertension, cardiovascular disease, malignancy, gastro-intestinal problems, antiplatelet drug use, and primary kidney disease

<sup>b</sup>Additionally adjusted for hemoglobin levels



**Table S8.** Vitamin K antagonist use and hazard ratios for start of dialysis; restriction to patients with cardiovascular disease

|                                                   | <b>HR (95% CI)</b>  |
|---------------------------------------------------|---------------------|
| Vitamin K antagonist non-users                    | 1<br>(Reference)    |
| Vitamin K antagonist users, crude                 | 0.66 (0.45 to 0.97) |
| Vitamin K antagonist users, adjusted <sup>a</sup> | 0.80 (0.52 to 1.25) |
| Vitamin K antagonist users, adjusted <sup>b</sup> | 1.04 (0.66 to 1.65) |

<sup>a</sup>Adjusted for: age, sex, race, diabetes mellitus, hypertension, cardiovascular disease, malignancy, gastro-intestinal problems, antiplatelet drug use, and primary kidney disease

<sup>b</sup>Additionally adjusted for hemoglobin and eGFR levels

**Table S9.** Vitamin K antagonist use and renal function decline: follow-up period five years

| Mean decline in eGFR (ml/min/1.73 m <sup>2</sup> /y) | -1.13 (-1.43 to -0.83)                                                      |
|------------------------------------------------------|-----------------------------------------------------------------------------|
|                                                      | Change in decline in eGFR<br>ml/min/1.73m <sup>2</sup> per year (95%<br>CI) |
| Vitamin K antagonist non-users                       | Reference                                                                   |
| Vitamin K antagonist users, crude                    | 0.33 (-0.61 to 1.27)                                                        |
| Vitamin K antagonist users, adjusted <sup>a</sup>    | -0.00 (-1.04 to 1.03)                                                       |
| Vitamin K antagonist users, adjusted <sup>b</sup>    | 0.09 (-0.97 to 1.15)                                                        |

<sup>a</sup>Adjusted for: age, sex, race, diabetes mellitus, hypertension, cardiovascular disease, malignancy, gastro-intestinal problems, antiplatelet drug use, and primary kidney disease

<sup>b</sup>Additionally adjusted for hemoglobin levels

**Table S10.** Vitamin K antagonist use and hazard ratios for start of dialysis; follow-up period five years

|                                                         | HR (95% CI)         |
|---------------------------------------------------------|---------------------|
| Vitamin K antagonist non-users, N=883                   | 1<br>(Reference)    |
| Vitamin K antagonist users, crude, N=101                | 0.84 (0.62 to 1.13) |
| Vitamin K antagonist users, adjusted <sup>a</sup> N=101 | 0.91 (0.65 to 1.27) |
| Vitamin K antagonist users, adjusted <sup>b</sup> N=101 | 0.99 (0.98 to 0.99) |

<sup>a</sup>Adjusted for: age, sex, race, diabetes mellitus, hypertension, cardiovascular disease, malignancy, gastro-intestinal problems, antiplatelet drug use, and primary kidney disease

<sup>b</sup>Additionally adjusted for hemoglobin and eGFR levels

**Figure S1: Kaplan Meier 5 years of follow-up for start of dialysis stratified for vitamin K antagonist use**

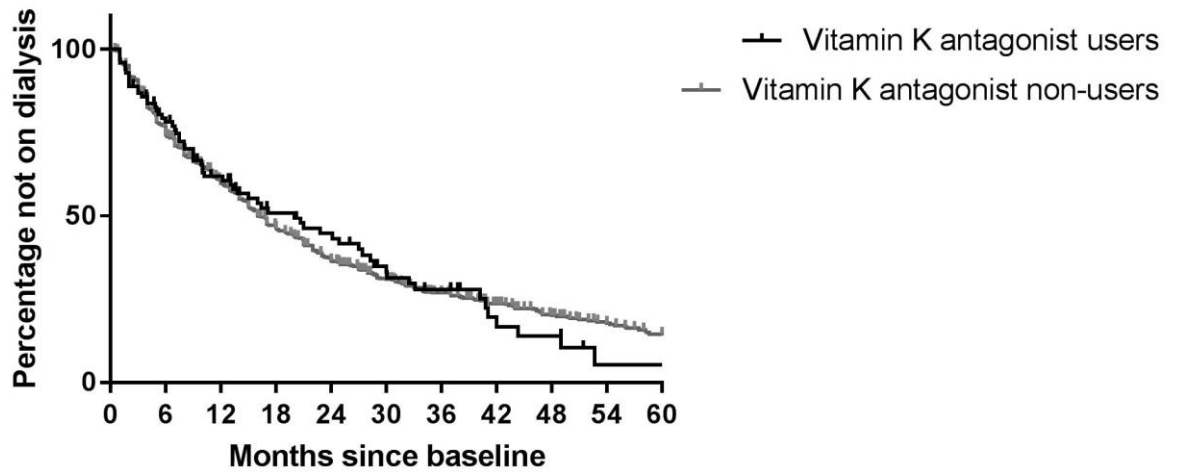

|                                                  |     |     |     |     |     |     |     |     |    |    |    |
|--------------------------------------------------|-----|-----|-----|-----|-----|-----|-----|-----|----|----|----|
| Month                                            | 0   | 6   | 12  | 18  | 24  | 30  | 36  | 42  | 48 | 54 | 60 |
| Number at risk<br>vitamin K antagonist users     | 101 | 70  | 50  | 34  | 29  | 20  | 15  | 7   | 5  | 1  | 1  |
| Number at risk<br>vitamin K antagonist non-users | 883 | 632 | 470 | 336 | 248 | 190 | 145 | 107 | 75 | 49 | 34 |
